# Supplementary material for: Vaccine-Induced Memory CD8+ T Cells Provide Clinical Benefit in HER2 Expressing Breast Cancer: A Mouse to Human Translational Study
Source: Oxford University Press journal article supplement (doi:10.1158/1078-0432.ccr-18-3102), 2019-01-11
Supplement: 10780432ccr183102-sup-209210_2_supp_5252850_pkq4gb.xlsx [file 10780432ccr183102-sup-209210_2_supp_5252850_pkq4gb.xlsx]

## Sheet: Sheet1
Supplementary table 1: CYTOF panel. Surface markers shown in black and cytokine shown in red. Antibodies not marked with corresponding manufacturers were purchased from Fluidigm.
Supplementary table 1: CYTOF panel. Surface markers shown in black and cytokine shown in red. Antibodies not marked with corresponding manufacturers were purchased from Fluidigm.
	Metal	Ab	Clone
1	113 In	LD
2	115 IN	LD
3	141 Pr	CD49d	9F10
4	142 Nd	CD19	HIB19
5	145 Nd	CD4	RPA-T4
6	146 Nd	CD8	SK1
7	147 Sm	CD20	2H7
8	148 Nd	CD57	HCD, BioLegend
9	149 Sm	CD85j	292319, R&D Systems
10	150 Nd	MIP1b	D21-1351
11	151 Eu	CD107a	H4A3
12	152 Sm	TNFa	Mab11
13	153 Eu	CD45RA	HI100
14	154 Sm	CD3	UCHT1
15	155 Gd	CD28	L293, BD
16	156 Gd	CD38	HB-7, BD
17	157 Gd	HLA-DR	G46-6, BD
18	158 Gd	CD33	P67.8
19	159 Tb	GMCSF	BVD2-21C11
20	160 Gd	CD14	M5E2
21	161 Dy	IFNg	4S.B4, eBioscience
22	162 Dy	CD69	MCA 1442
23	163 Dy	TCRgd	B1, BioLegend
24	164 Dy	IL-17	N49-853
25	165 Ho	CD127	A019D5
26	166 Er	IL-2	MQ1-17h12
27	167 Er	CD27	L128
28	168 Er	CD40L	24-31
29	169 Tm	CCR7	15053, R&D Systems
30	170 Er	PD-1	EH12.1, BD
31	171 Yb	Granzyme B	GB11
32	172 Yb	NKG2C	134591, R&D Systems
33	173 Yb	CD25	M-A251, BD
34	174 Yb	CD16	3G8, BioLegend
35	175 Lu	Perforin	B-D48
36	176 Yb	CD56	NCAM16.2
37	191 Lr	DNA
38	193 Lr	DNA
