# Supplementary material for: Vaccine-Induced Memory CD8+ T Cells Provide Clinical Benefit in HER2 Expressing Breast Cancer: A Mouse to Human Translational Study
Source: Oxford University Press journal article supplement (doi:10.1158/1078-0432.ccr-18-3102), 2019-01-11
Supplement: 10780432ccr183102-sup-209210_2_supp_5252851_pkq4gb.xlsx [file 10780432ccr183102-sup-209210_2_supp_5252851_pkq4gb.xlsx]

## Sheet: Sheet1
Supplementary Table 2: Concurrent HER2 therapies for each patient for whom CYTOF analysis was done.
Patient ID	Concurrent therapy	Increased perforin post vax
3	Tras/Pertuz	No
4	Tras/Lap	No
9	Tras/Lap	No
10	Tras/Pertuz	No
19	Tras/Lap	Yes
17	Lap	Yes
5	TDM-1	Yes
11	TDM-1	Yes
12	TDM-1	Yes
8	Tras	Yes
13	Tras	Yes
18	Tras/Pertuz	Yes
